# Supplementary material for: Redox-Dependent Modulation of Human Liver Progenitor Cell Line Fate
Source: MDPI journal article supplement (doi:10.3390/ijms24031934), 2023-01-18
Supplement: s1 [file s1]

## Redox-dependent modulation of human liver progenitor cell line fate

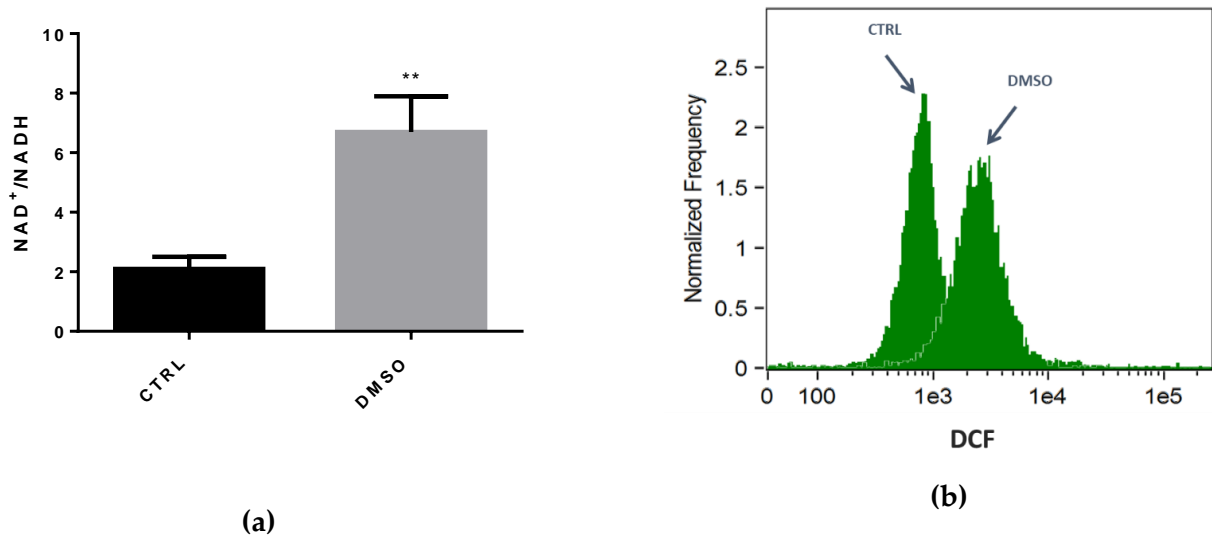

**Figure S1.** (a) NAD<sup>+</sup>/NADH content in HepaRG cells in basal conditions (CTRL) or after 2 weeks exposure to dimethyl sulfoxide (DMSO). Data in the graph are represented as mean  $\pm$  SEM of three independent experiments. Statistical differences were assessed by student's t-test. \*\* =  $p < 0.01$  vs CTRL. (b) Flow cytometry histograms of HepaRG cells in basal conditions (CTRL) or after 2 weeks exposure to dimethyl sulfoxide (DMSO), after staining with dichlorofluorescein (DCF).

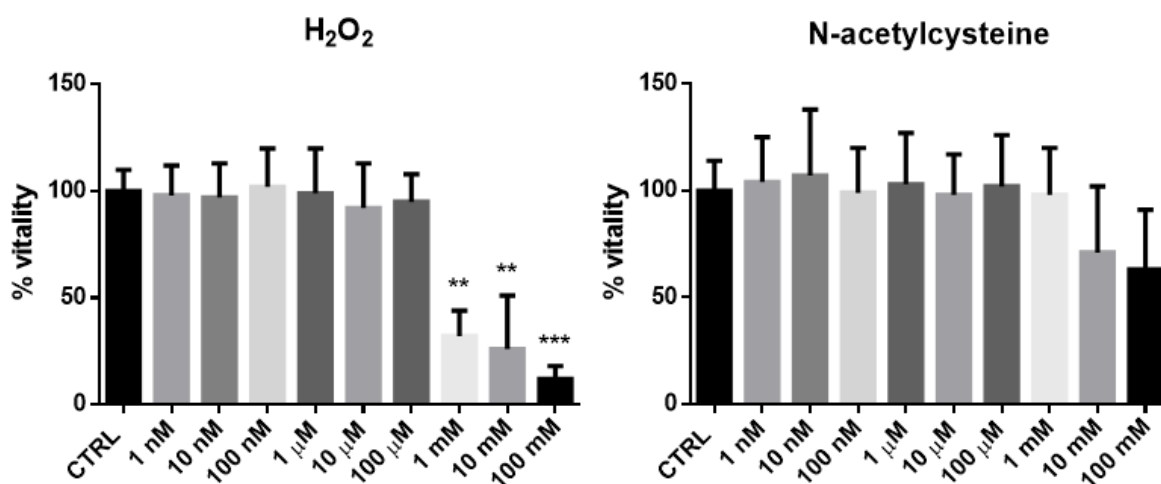

**Figure S2.** Cell viability of confluent HepaRG measured by 3-(4,5-dimethylthiazol-2-yl)-2,5-diphenyltetrazolium bromide (MTT) reduction after 24 hours exposure to increasing concentrations of H<sub>2</sub>O<sub>2</sub> or N-acetylcysteine. Data in the graph are represented as mean  $\pm$  SEM of three independent experiments. Statistical differences were assessed by one-way ANOVA and Tukey-Kramer as post hoc test. \*\* =  $p < 0.01$  vs CTRL; \*\*\* =  $p < 0.001$  vs CTRL.

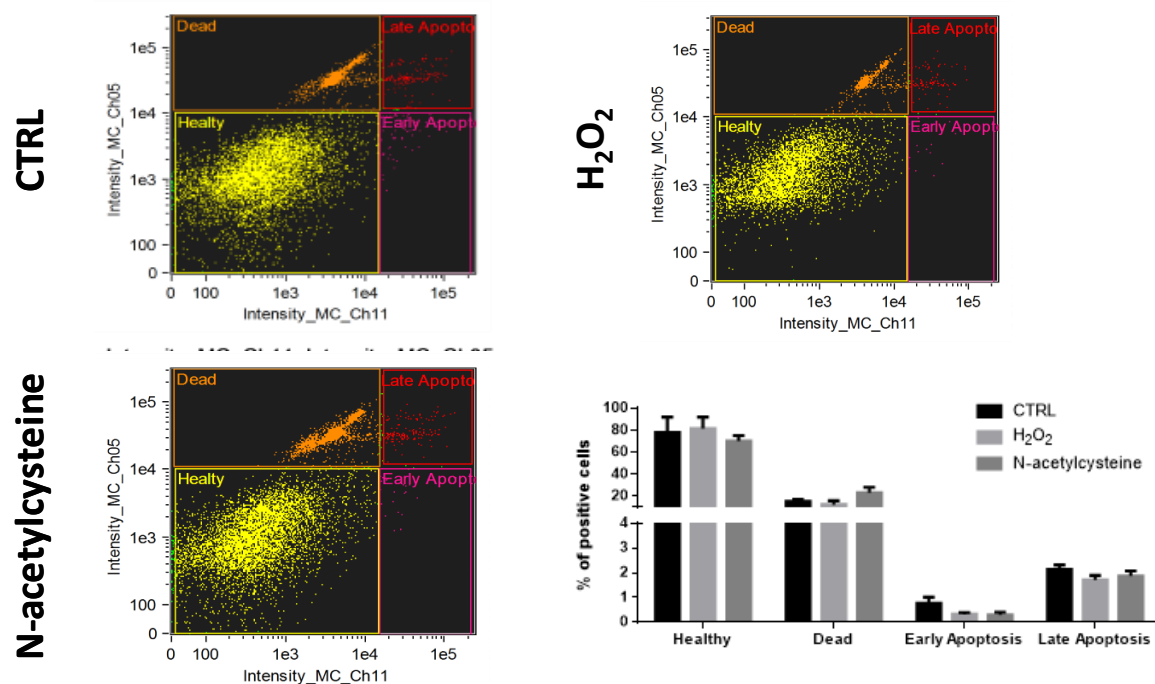

**Figure S3.** Flow cytometry scatter plots of apoptosis in confluent HepaRG exposed to H<sub>2</sub>O<sub>2</sub> or N-acetylcysteine every 24 hours for 5 days, assessed after staining with annexin V (AV) and 7-Amino-Actinomycin D (7-AAD). Dead: AV negative/7-AAD positive cells (necrosis); Late Apoptosis: AV/7-AAD positive cells; Early Apoptosis: AV positive/7-AAD negative cells; Healthy: AV/7-AAD negative cells (viable). Data in the graphs are represented as mean  $\pm$  SD of three independent experiments.

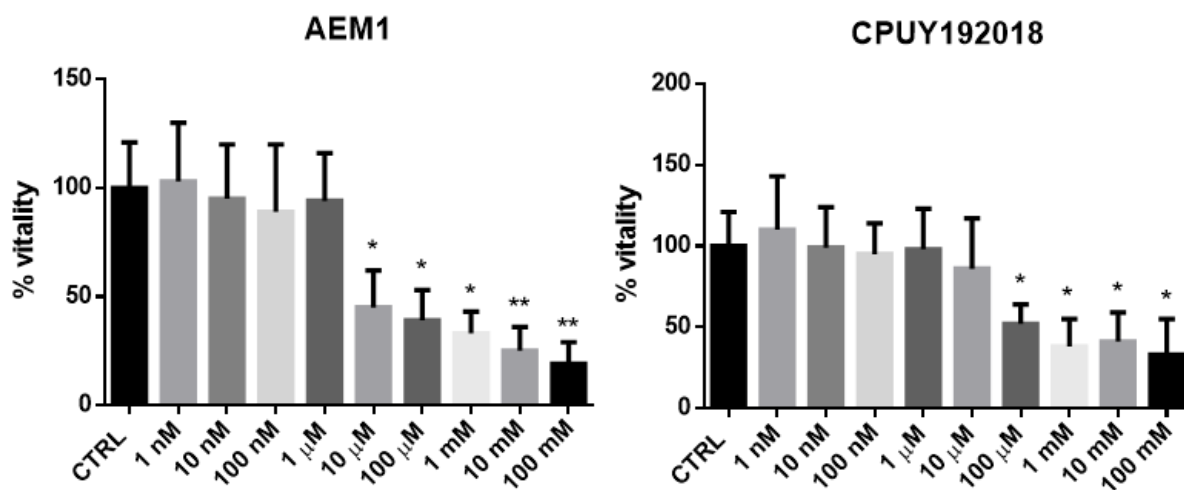

**Figure S4.** Cell viability of confluent HepaRG measured by 3-(4,5-dimethylthiazol-2-yl)-2,5-diphenyltetrazolium bromide (MTT) reduction after 24 hours exposure to vehicle (CTRL), or increasing concentrations of ARE expression modulator 1 (AEM1) or CPUY192018. Data in the graph are represented as mean  $\pm$  SEM of three independent experiments. Statistical differences were assessed by one-way ANOVA and Tukey-Kramer as post hoc test. \* =  $p < 0.05$  vs CTRL; \*\* =  $p < 0.01$  vs CTRL.

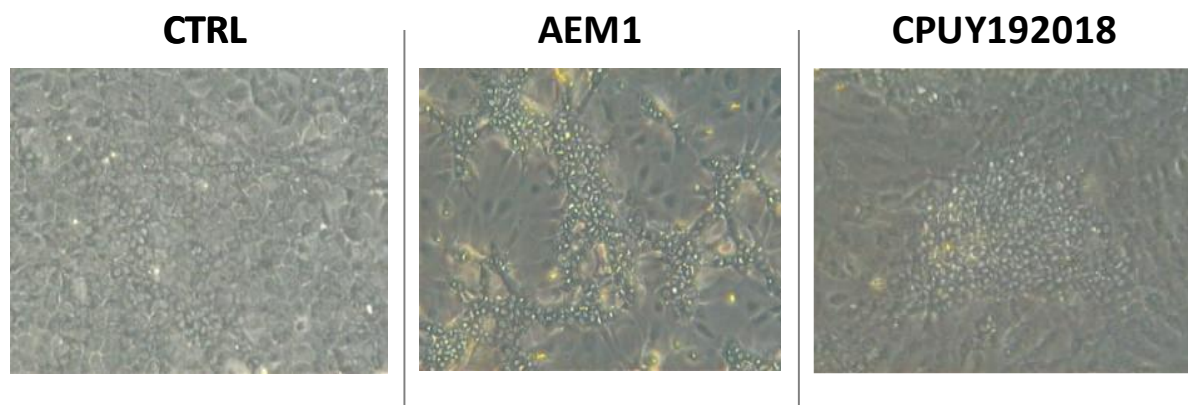

**Figure S5.** Representative microscopic images of confluent HepaRG cells exposed to vehicle (CTRL), 1  $\mu$ M ARE expression modulator 1 (AEM1) or 10  $\mu$ M CPUY192018 every 24 hours for 5 days.

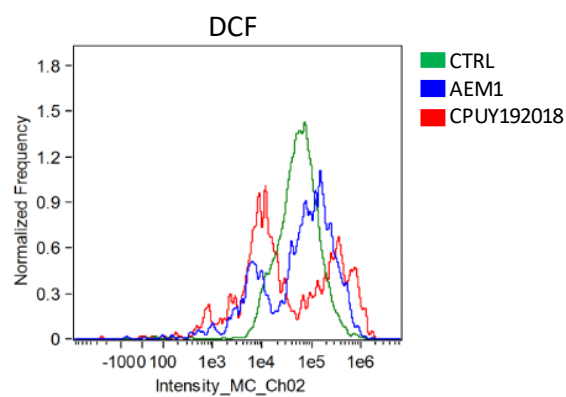

**Figure S6.** Flow cytometry histograms of confluent HepaRG cells exposed to vehicle (CTRL), 1  $\mu$ M ARE expression modulator 1 (AEM1) or 10  $\mu$ M CPUY192018 every 24 hours for 5 days, after staining with dichlorofluorescein (DCF).

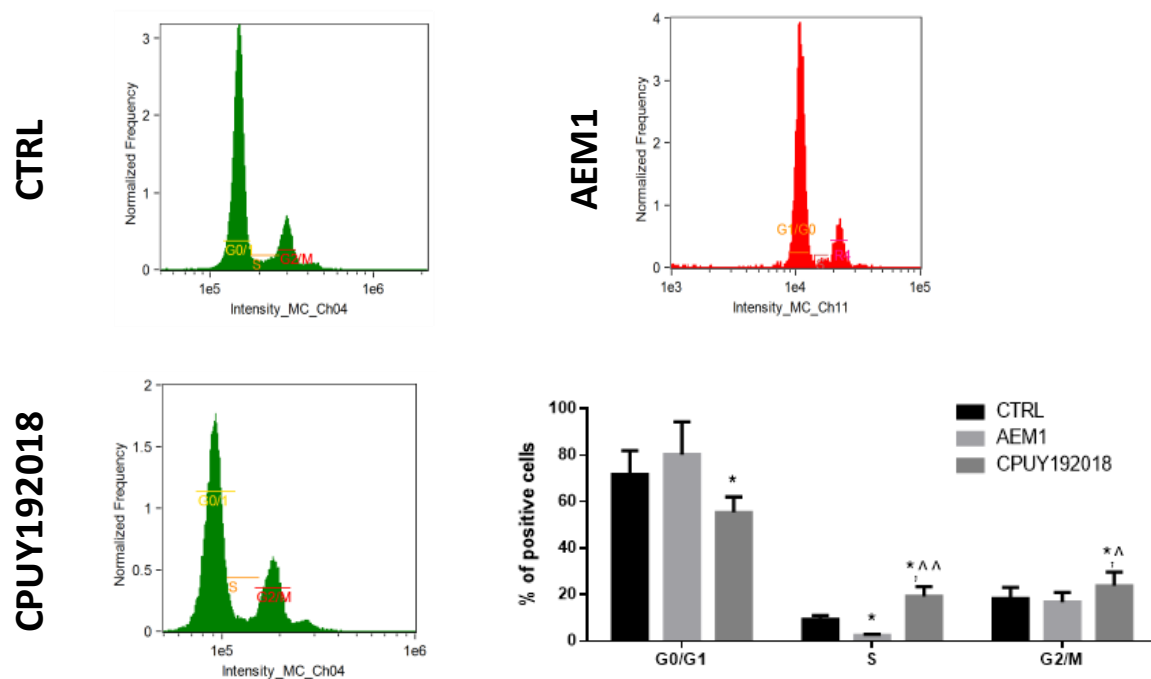

**Figure S7.** Cell cycle analysis in confluent HepaRG cells exposed to vehicle (CTRL), 1  $\mu$ M ARE expression modulator or 10  $\mu$ M CPUY 192018 every 24 hours for 5 days. Data in the graph are represented as mean  $\pm$  SEM of three independent experiments. Statistical differences were assessed by one-way ANOVA and Tukey-Kramer as post hoc test. \* =  $p < 0.05$  vs CTRL; ^ =  $p < 0.05$  vs AEM1; ^^ =  $p < 0.01$  vs AEM1.

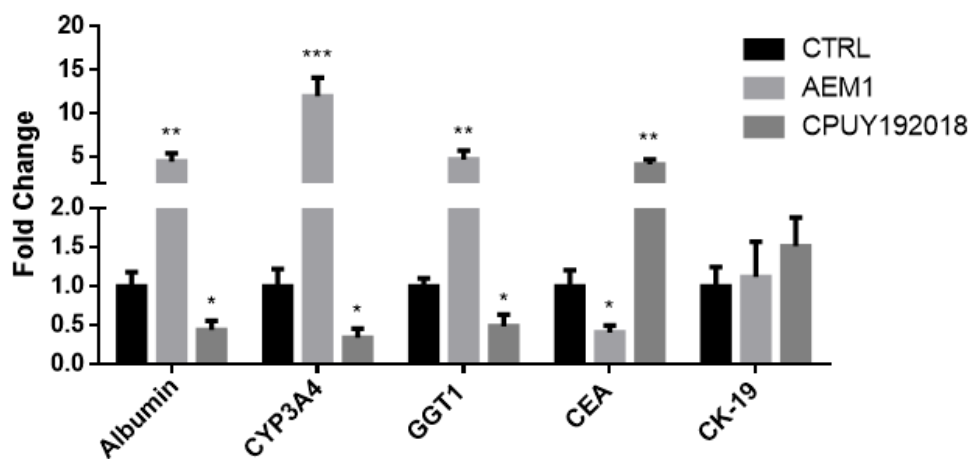

**Figure S8.** mRNA expression of genes associated with differentiation status in confluent HepaRG cells exposed to vehicle (CTRL), 1  $\mu$ M ARE expression modulator 1 (AEM1) or 10  $\mu$ M CPUY192018 every 24 hours for 5 days. Data in the graph are represented as mean  $\pm$  SEM of three independent experiments. Statistical differences were assessed by one-way ANOVA and Tukey-Kramer as post hoc test. \* =  $p < 0.05$  vs CTRL; \*\* =  $p < 0.01$  vs CTRL; \*\*\* =  $p < 0.001$  vs CTRL.

**Table S1.** Sequences of forward (FOR) and reverse (REV) primers of the genes studied. CYP3A4: cytochrome P350 3A4; CEA, carcinoembryonic antigen; GGT1, gamma-glutamyl transpeptidase 1.

|                |       |     |                                 |
|----------------|-------|-----|---------------------------------|
| <b>ACTIN</b>   | Human | FOR | 5'-TGGACATCCGCAAAGACCTG-3'      |
|                |       | REV | 5'-GCCGATCCACACGGAGTACTT-3'     |
| <b>ALBUMIN</b> | Human | FOR | 5'-CCTGTTGCCAAAGCTCGATG-3'      |
|                |       | REV | 5'-GAAATCTCTGGCTCAGGCGA-3'      |
| <b>CYP3A4</b>  | Human | FOR | 5'-CTTCATCCAATGGACTGCATAAAT-3'  |
|                |       | REV | 5'-TCCCAAGTATAACACTCTACACAG-3'  |
| <b>CEA</b>     | Human | FOR | 5'-GGTCTTCAACCCAATCAGTAAGAAC-3' |
|                |       | REV | 5'-ATGGCCCCAGGTGAGAGG-3'        |
| <b>GGT1</b>    | Human | FOR | 5'-TTTGGTGTGCTGCTGGATGAC-3'     |
|                |       | REV | 5'-ACCTGAGCTTCCCCACCTATG-3'     |
